# Supplementary material for: One-step fabrication of vanadium-doped CoFe PBA nanosheets for efficient oxygen evolution reaction
Source: Royal Society of Chemistry journal article supplement (doi:10.1039/d3dt01629c), 2023-01-01
Supplement: d3dt01629c1.pdf [file d3dt01629c1.pdf]

## Supplementary Information

### One step to fabricate Vanadium-doped CoFe PBA nanosheets for efficient oxygen evolution reaction

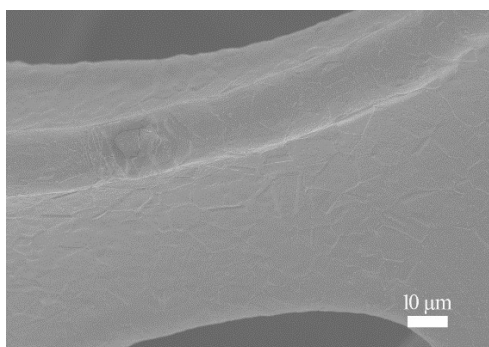

**Fig. S1** SEM image of bare NF

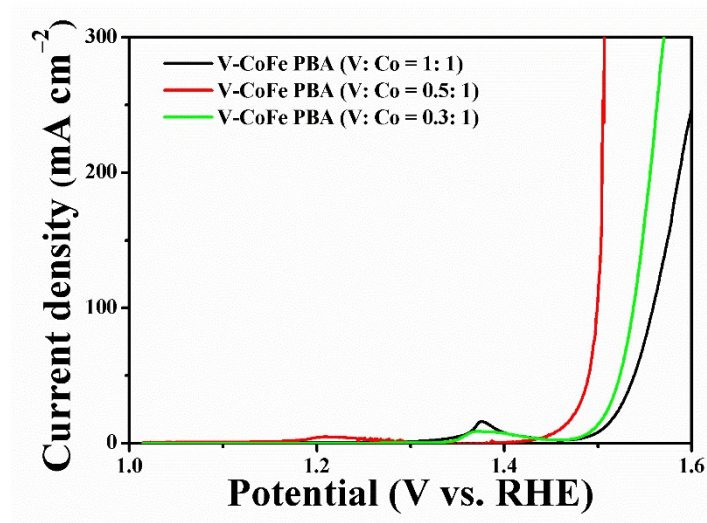

**Fig. S2** OER LSV polarization curves of V-CoFe PBA with different V/Co ratios.

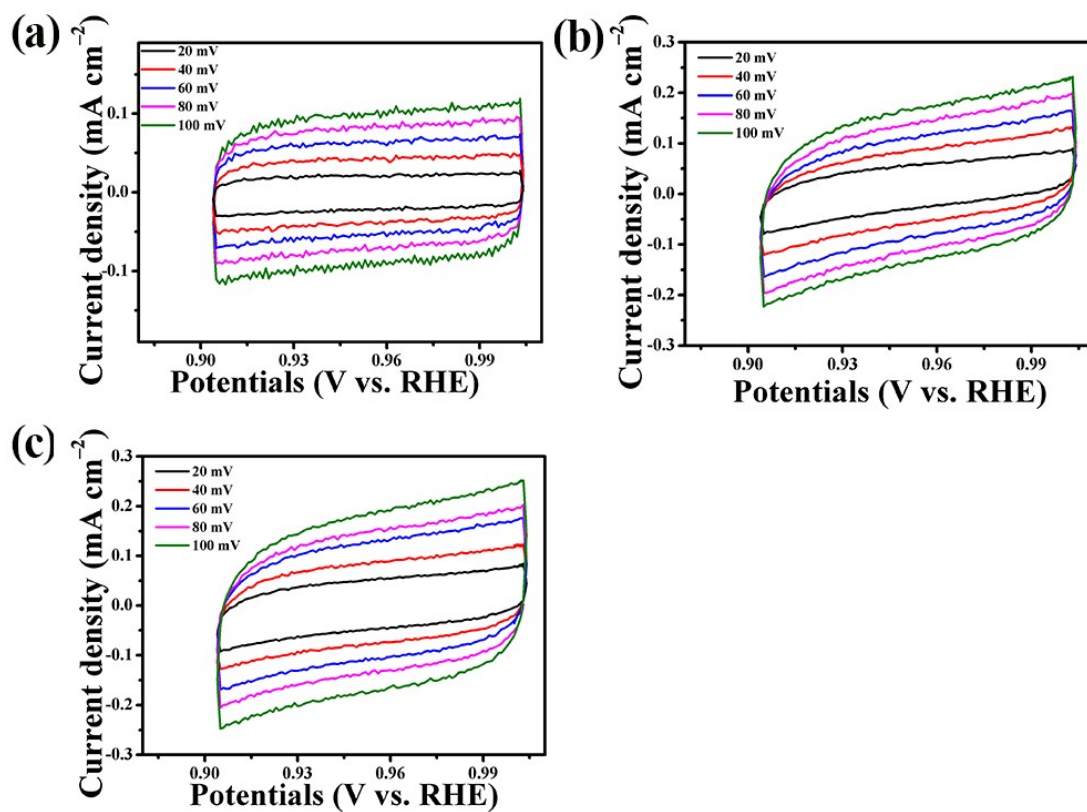

**Fig. S3** (a), (b) and (c) are cyclic voltammograms of bare NF, CoFe PBA and V-CoFe PBA at different sweep rates.

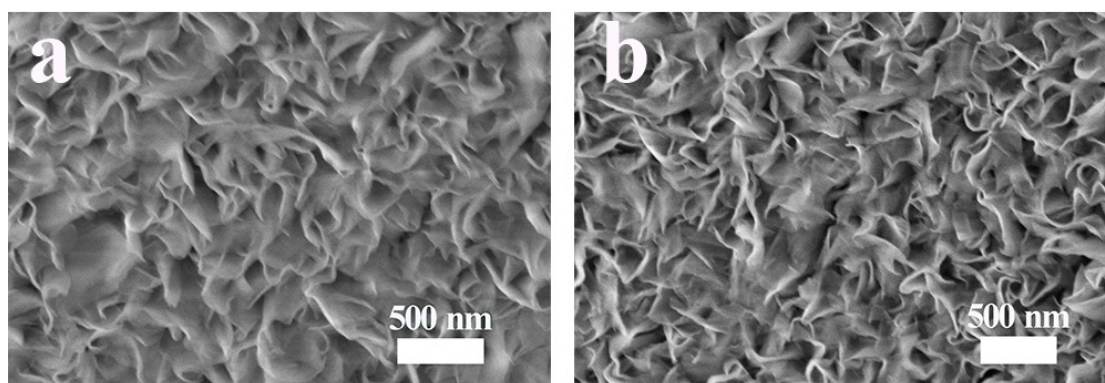

**Fig. S4.** SEM images of V-CoFe PBA after the durability test at current density of  $10 \text{ mA cm}^{-2}$ .

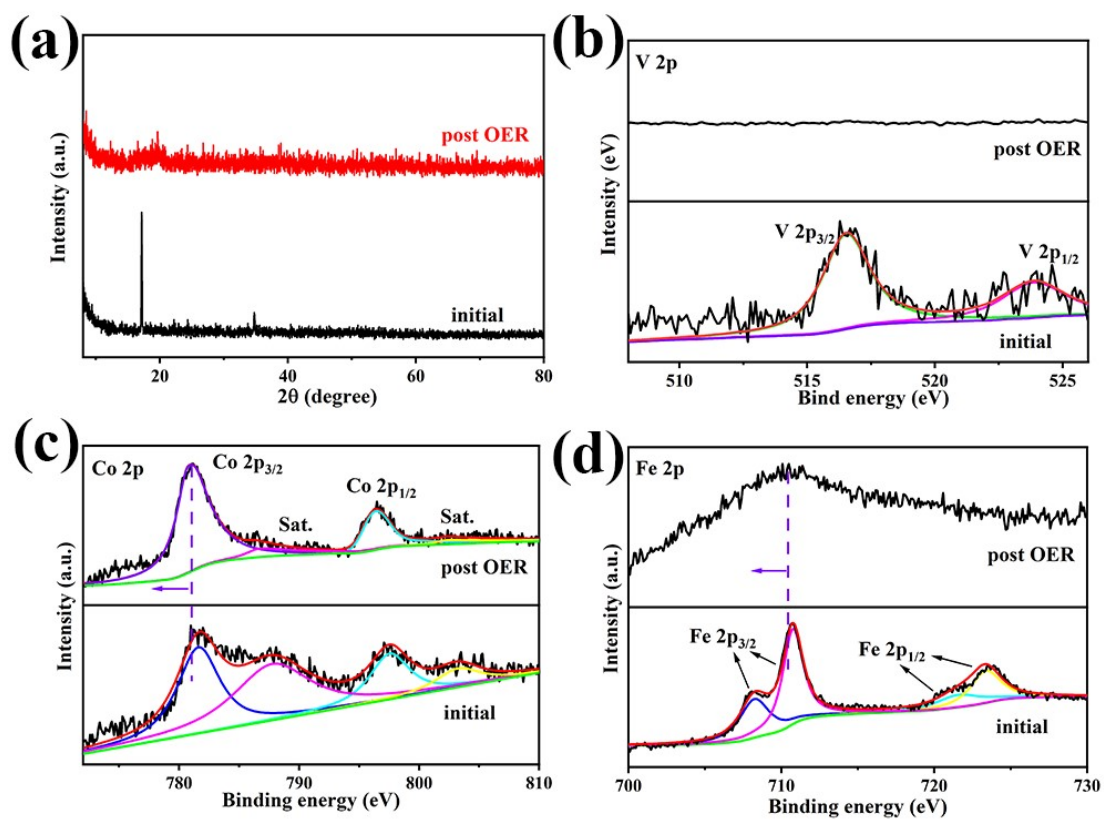

**Fig. S5.** (a) XRD spectra of V-CoFe PBA before and after the durability tests. XPS spectra of (b) V 2p; (c) Co 2p and (d) Fe 2p of V-CoFe PBA before and after the durability test at current density of  $10 \text{ mA cm}^{-2}$ .
